# Supplementary material for: Assessment of primary open-angle glaucoma peripapillary and macular choroidal area using enhanced depth imaging optical coherence tomography
Source: PLoS One. 2020 Apr 6;15(4):e0231214. doi: 10.1371/journal.pone.0231214 (PMC7135285; doi:10.1371/journal.pone.0231214)
Supplement: S1 Data — (XLSX) [file pone.0231214.s001.xlsx]

## Sheet: Sheet1
POAG			Macula			Peripapillary			BP							Healthy			Macula			Peripapillary			BP
	Gender	Age	Total	Luminal	Interstitial	Total	Luminal	Interstitial	Systolic	Diastolic	IOP	Axial length	CCT	OPP			Age	Gender	Total	Luminal	Interstitial	Total	Luminal	Interstitial	Systolic	Diastolic	IOP	Axial length	CCT	OPP
	M	63	436597	279720	156876	1.897e+06	1.10717e+06	789837	113	61	16	26.97	*	36.2222			F	56	494220	320430	173789	1.78196e+06	874750	907205	122	82	12.3	25.17	544	51.2556
	M	62	277140	173545	103595	1.74649e+06	969017	777473	96	73	13	26.08	565	40.7778			F	48	316460	211422	105038	2.75329e+06	1.64545e+06	1.10784e+06	117	71	18	27.32	574	39.5556
	F	72	337072	238176	98895.7	1.9058e+06	1.1169e+06	788897	122	74	17	23.41	548	43			M	69	427883	298882	129001	2.28172e+06	1.41551e+06	866213	146	95	19.7	22.46	468	54.9667
	M	66	260645	156927	103718	1.66956e+06	972757	696800	136	81	16	24	520	50.2222			M	66	276891	182841	94050.2	1.45324e+06	719507	733729	101	58	11.3	23.49	434	36.9222
	F	64	271794	172648	99145.4	1.52209e+06	721252	800834	137	80	18	25.53	562	48			F	56	359096	202743	156352	1.91076e+06	1.11908e+06	791680	131	92	19.7	27.92	583	50.3
	M	71	447343	300851	146493	2.09528e+06	1.26037e+06	834907	119	67	14	24.87	557	42.2222			F	72	557131	368702	188429	2.15478e+06	1.24779e+06	906997	132	68	14.7	21.74	556	44.8556
	M	79	362307	243222	119085	1.58108e+06	855575	725502	106	64	12	22.75	478	40			F	63	450311	302934	147377	2.13523e+06	1.2121e+06	923133	89	69	15	24.75	490	35.4444
	F	69	474208	353275	120934	2.01473e+06	1.19655e+06	818180	143	92	13	21.86	504	59.6667			M	44	409512	273751	135761	2.18326e+06	1.28814e+06	895118	128	77	21.7	24.44	556	40.9667
	F	63	230643	154938	75704.8	1.53497e+06	800872	734101	107	79	14	27.41	587	44.8889			F	70	225790	117801	107988	1.69528e+06	912360	782918	119	72	19	27.18	568	39.4444
	F	75	415684	280388	135296	1.89297e+06	1.11035e+06	782616	99	59	11	23.18	466	37.2222			M	34	338663	247699	90963.9	3.75032e+06	2.31145e+06	1.43887e+06	133	71	14	23.21	477	47.1111
	F	69	393178	240766	152412	2.06058e+06	1.11074e+06	949835	163	87	15	23.75	548	59.8889			M	71	211389	125723	85666.1	1.15203e+06	591461	560572	134	73	17.3	26.23	535	44.9222
	F	53	394446	258029	136416	2.34506e+06	1.51203e+06	833039	150	93	14	23.87	481	60.6667			M	69	182406	113368	69038.8	957925	440653	517272	106	77	13.3	22.87	524	44.4778
	M	45	341147	220082	121064	2.28206e+06	1.27841e+06	1.00365e+06	120	68	16	26.54	554	40.8889			M	61	344280	239686	104594	1.99879e+06	1.06577e+06	933017	115	88	23	26.63	517	41.6667
	F	56	320734	222542	98191.8	2.00588e+06	1255506	750369	114	73	18	23.98	542	39.7778			F	73	323627	208273	115353	1.87373e+06	1.09471e+06	779025	127	73	12	23.43	517	48.6667
	M	66	261493	172043	89449.7	1.63832e+06	848386	789930	139	73	15	26.79	539	48.3333			F	61	168714	105128	63585.9	1.40468e+06	701839	702843	103	57	11.7	27.15	505	36.5222
	F	62	428850	290140	138709	2.20014e+06	1.34923e+06	850906	133	76	14	23.83	586	49.3333			F	64	181783	107974	73808.7	1.30538e+06	682367	623014	98	62	15.7	23.64	528	33.6333
	F	66	166947	95415.1	71532	1.42029e+06	775189	645103	120	84	21	27.04	616	43			F	76	408383	282426	125957	1.75369e+06	1.02123e+06	732465	121	81	15	22.09	507	47.8889
	M	51	377806	274705	103101	1.34354e+06	780484	563056	141	93	24	28.31	581	48.6667			F	80	330636	214003	116633	1.31598e+06	659564	656411	153	78	17.3	21.45	501	51.3667
	F	73	241750	155129	86620.5	1.09212e+06	658188	433936	136	75	14	23.75	523	49.5556			F	74	195609	117545	78063.3				119	68	20.3	27.22	496	36.3667
	F	70	291222	170967	120255	1.55429e+06	876971	677324	158	81	11	24.33	578	60.1111			F	70	393322	270035	123287	1.4887e+06	788946	699754	159	66	19.7	24.69	577	44.9667
	M	83	132087	91911.6	40175.5	957381	425833	531548	107	69	18	22.5	511	36.4444			F	86	209244	132802	76442	1.02279e+06	465796	556990	132	93	15	22.07	484	55.6667
	M	68	311937	211975	99962.1	1.78797e+06	1.09637e+06	691600	150	104	19	26.07	286	60.5556			M	83	327030	223493	103536	2.40555e+06	1.44296e+06	962584	154	80	11.3	23.74	532	58.4778
	M	77	235493	146974	88518.7	1.32002e+06	700190	619831	118	65	17	23.57	559	38.1111			M	69	303401	202875	100527	2.79762e+06	1.64e+06	1.15762e+06	125	98	11	25.73	538	60.3333
	M	79	400832	299920	100912	2.21836e+06	1.34602e+06	872337	145	91	15	21.73	561	57.6667			M	52	570388	361819	208569	1.75023e+06	1.00688e+06	743350	146	77	14	24.81	537	52.6667
	M	66	262813	183743	79069.9	1.379e+06	762980	616022	106	88	20	26.65	566	42.6667			M	69	171694	96217.8	75476.8	1.42539e+06	672094	753300	113	64	11.3	26.69	503	42.2556
	F	74	461429	312393	149036	2.68184e+06	1.52069e+06	1.16115e+06	119	81	17	25.07	477	45.4444			F	62	279513	191469	88044.4	1.69896e+06	907220	791737	155	97	17.3	23.81	448	60.2556
	F	78	422125	299875	122250	1.83173e+06	983299	848433	119	60	20	22.29	564	33.1111			F	72	473815	300174	173641	1.6388e+06	895773	743027	128	71	15	23.13	549	45
	M	84	196643	112275	84367.7	1.23097e+06	529729	701240	137	88	14	25.73	515	55.5556			M	86	127000	83137.6	43862.2	1.10885e+06	540383	568468	123	83	11.7	24.39	*	52.5222
	M	79	375498	242578	132920	1.51011e+06	882522	627590	160	58	14	23.32	439	47.3333			M	61	394917	278050	116867	2.05909e+06	1.08997e+06	969119	152	92	16	24.2	532	58.6667
	F	71	363454	236852	126601	1.51759e+06	758464	759124	135	82	19	25.03	503	47.4444			F	68	253326	166457	86869.4	1.56862e+06	841433	727188	143	67	17	24.96	512	44.5556
	M	67	433150	277594	155555	2.28407e+06	1.34318e+06	940894	155	103	20	24.23	518	60.2222			F	59	390980	262826	128154	3.0133e+06	1.89795e+06	1.11536e+06	124	75	15	24.81	471	45.8889
	M	84	162804	102944	59859.4	884822	395951	488871	107	69	18	22.5	511	36.4444			M	42	360966	233210	127757	1.94123e+06	1.02197e+06	919259	102	68	16	26.79	565	36.8889
	M	42	465458	299001	166457	1.44349e+06	727433	716055	132	87	13	23.66	545	55			F	72	329568	228556	101012	2.23266e+06	1.34616e+06	886495	123	73	13	22.88	501	46.7778
	F	68	332451	231399	101053	1.6994e+06	881303	818093	145	71	16	24.59	576	47.7778			F	77	211740	127708	84032	1.37596e+06	661406	714557	124	81	8.3	23.53	475	55.2556
	M	42	433138	286575	146563	1.87244e+06	1.05387e+06	818569	129	88	17	27.58	526	50.7778			F	83	465603	329106	136497	2.0503e+06	1.2027e+06	847605	119	43	7.3	22.47	511	38.2556
	F	68	572513	361408	211106	2.88366e+06	1.76082e+06	1.12284e+06	127	85	15	23.86	534	51			M	75	491490	314729	176761	1.84723e+06	1.10204e+06	745195	134	69	14	23.16	581	46.4444
	M	67	229958	149333	80625.9	1.27686e+06	649799	627064	135	81	16	26.71	529	50			F	69	557275	363504	193771	1.75442e+06	987903	766516	132	76	18.7	25.16	577	44.4111
	M	70	499526	313803	185723	2.12213e+06	1.13897e+06	983153	116	78	16	24.49	582	44.4444			M	69	156251	86214.9	70035.7	1.21212e+06	589962	622156	150	75	18.7	25.23	638	47.9667
	M	67	283972	177883	106089	1.59883e+06	805520	793309	131	84	17	28.76	540	49.4444			M	71	419418	274431	144987	1.49953e+06	826112	673418	158	86	12.3	22.65	521	61.0333
	F	79	201313	121437	79875.9	1.54007e+06	754791	785281	131	86	15	25.5	514	52.3333			M	91	252452	145149	107304	1.31012e+06	611586	698534	122	70	13	23.16	523	45.2222
	M	67	337385	211159	126226	1.52764e+06	763822	763822	135	80	13	26.38	468	52.5556			F	77	515381	362000	153381	2.10462e+06	1.31809e+06	786534	136	64	12	21.66	498	46.6667
	F	63	527108	338662	188446	3.20316e+06	1.95128e+06	1.25187e+06	143	71	23	24.49	525	40.3333			F	58	385030	259643	125388	2.69544e+06	1.64346e+06	1.05198e+06	108	67	13	23.7	537	40.7778
																	M	69	371082	234647	136435	1.75139e+06	909409	841982	126	82	13.3	23.73	574	51.1444
																	F	73	415709	282875	132834	1.46128e+06	753861	707420	133	87	12.7	25.78	566	55.5222
																	M	19	453206	305084	148122	1.91343e+06	1.07641e+06	837026	110	53	12.7	25.27	515	35.3
																	F	70	242165	149572	92593.1	1.11054e+06	621161	489380	120	73	18.7	24.91	573	40.4111
																	M	70	220496	110893	109602	1.43579e+06	697711	738076	132	75	13.7	26.13	444	48.9667
																	F	59	327026	222187	104838	2.52268e+06	1.53011e+06	992577	122	86	12	23.05	536	53.3333
																	F	59	535444	341760	193684	3.88486e+06	2.55742e+06	1.32744e+06	122	79	17.7	22.42	539	44.5222
																	M	53	558982	363514	195468	2.18837e+06	1.34395e+06	844418	118	84	17.3	24.59	538	46.2556
																	F	85	349991	239567	110424	1.39218e+06	678727	713456	140	75	11.7	22.46	553	52.7444
																	F	80	242315	136090	106225	1.01318e+06	461878	551300	129	72	11	22.19	506	49.6667
																	F	72	360379	238518	121861	1.5552e+06	834620	720578	151	105	19	23.89	559	61.2222
																	F	72	255810	151384	104426	1.23473e+06	578544	656189	127	71	11.7	22.79	499	48.0778
																	M	54	381280	250368	130911	2.01499e+06	1.17008e+06	844909	143	96	18	24.2	506	56.4444
																	F	75	417323	275842	141481	1.65376e+06	916589	737176	116	66	15.7	23.51	525	39.4111
																	F	68	417724	255631	162093	1.83883e+06	1.03932e+06	799509	139	81	13	22.17	542	53.8889
